# Supplementary material for: Complexes of Sodium Pectate with Nickel for Hydrogen Oxidation and Oxygen Reduction in Proton-Exchange Membrane Fuel Cells
Source: MDPI journal article supplement (doi:10.3390/ijms232214247), 2022-11-17
Supplement: s1 [file s1]

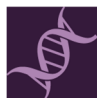

*Supplementary Material*

# Complexes of Sodium Pectate with Nickel for Hydrogen Oxidation and Oxygen Reduction in Proton-Exchange Membrane Fuel Cells

Irek R. Nizameev<sup>1,2</sup>, Danis M. Kadirov<sup>1,3</sup>, Guliya R. Nizameeva<sup>1,3</sup>, Aigul' F. Sabirova<sup>1</sup>, Kirill V. Kholin<sup>1,3</sup>, Mikhail V. Morozov<sup>2</sup>, Lyubov' G. Mironova<sup>1</sup>, Salima T. Minzanova<sup>1</sup>, Oleg G. Sinyashin<sup>1</sup>, and Marsil K. Kadirov<sup>1,3,\*</sup>

<sup>1</sup> Arbuzov Institute of Organic and Physical Chemistry, FRC Kazan Scientific Center, Russian Academy of Sciences, Kazan 420088, Russia

<sup>2</sup> Kazan National Research Technical University named after A.N. Tupolev - KAI, Kazan 420111, Russia

<sup>3</sup> Kazan National Research Technological University, Kazan 420015, Russia

\* Correspondence: kamaka59@gmail.com; Tel.: +7(927) 417-45-59

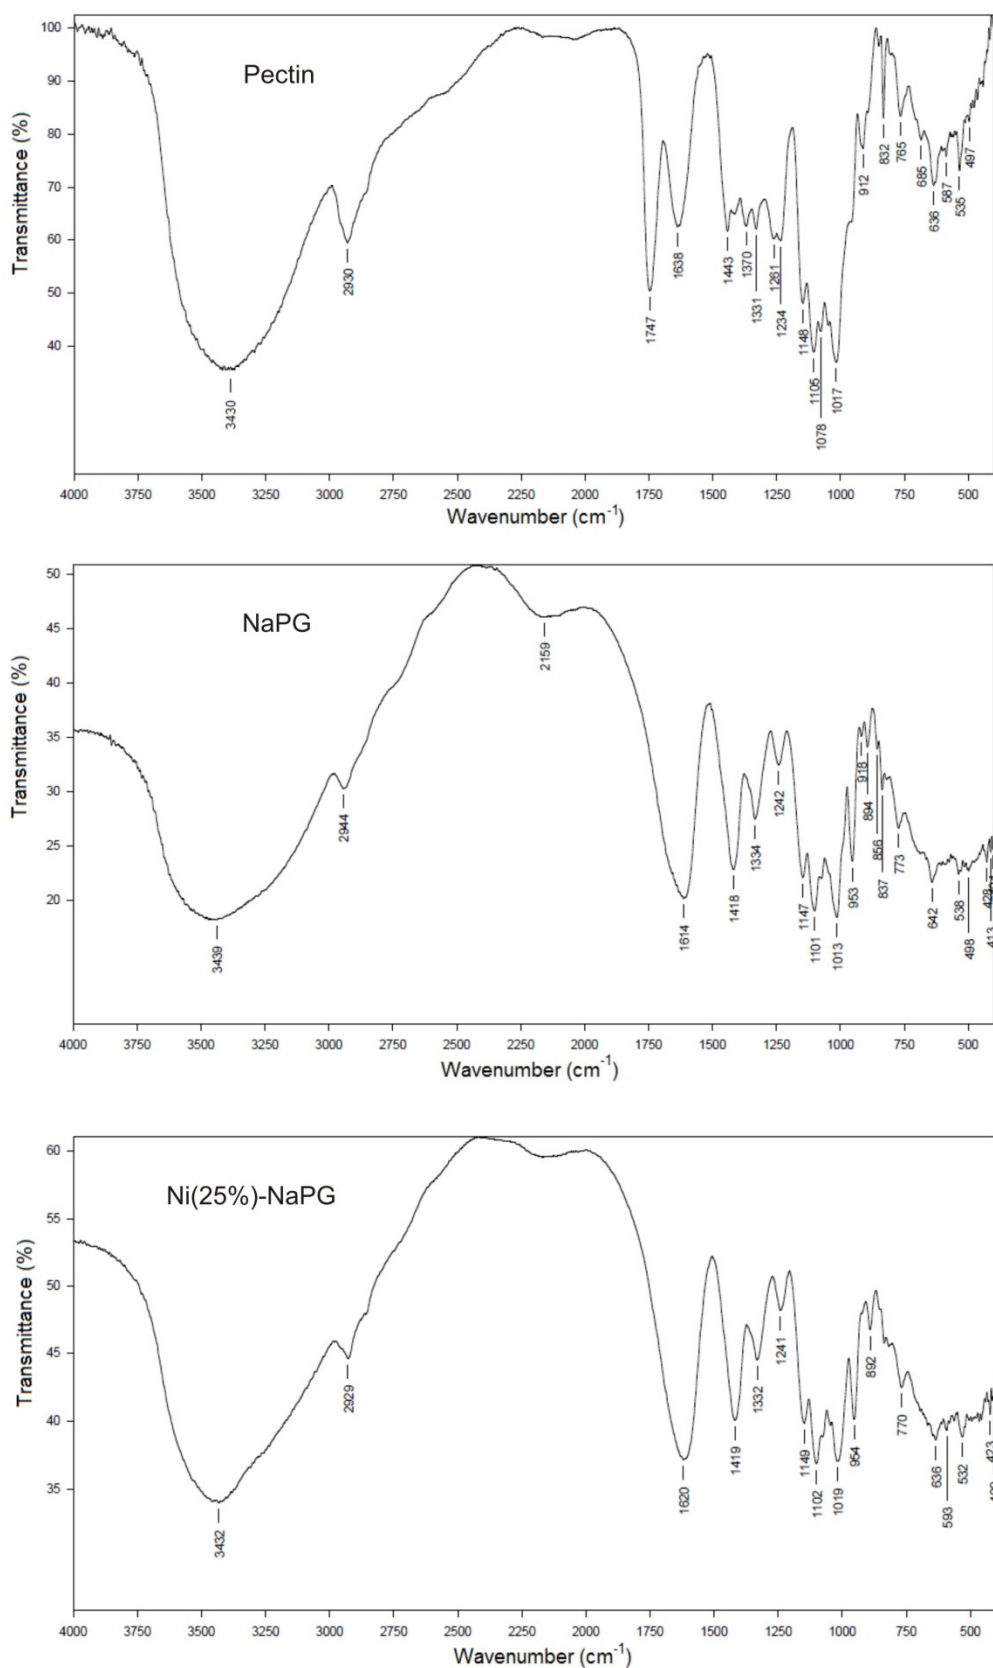

**Figure S1.** IR spectra of the pectin, sodium polygalacturonate (NaPG) and sodium polygalacturonate complex [Ni(25%)-NaPG] with 25% substitution of sodium with nickel.

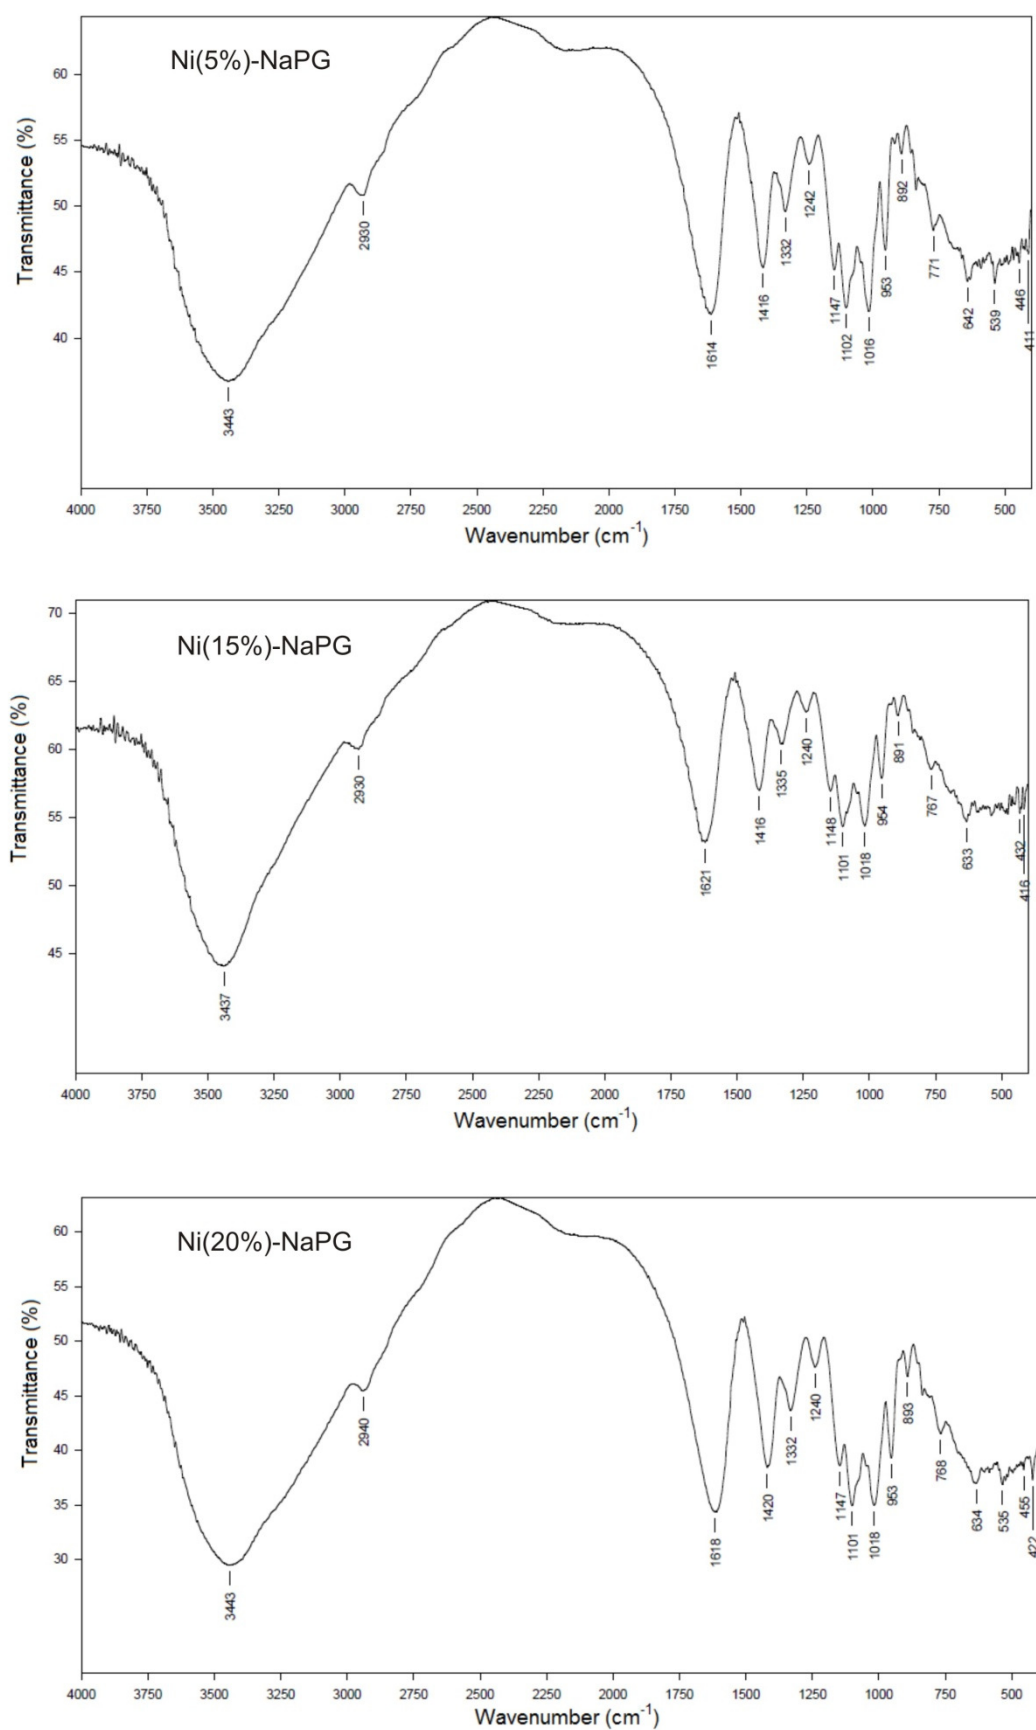

**Figure S2.** IR spectra of the sodium polygalacturonate complexes Ni(5%)-NaPG, Ni(15%)-NaPG, Ni(20%)-NaPG.

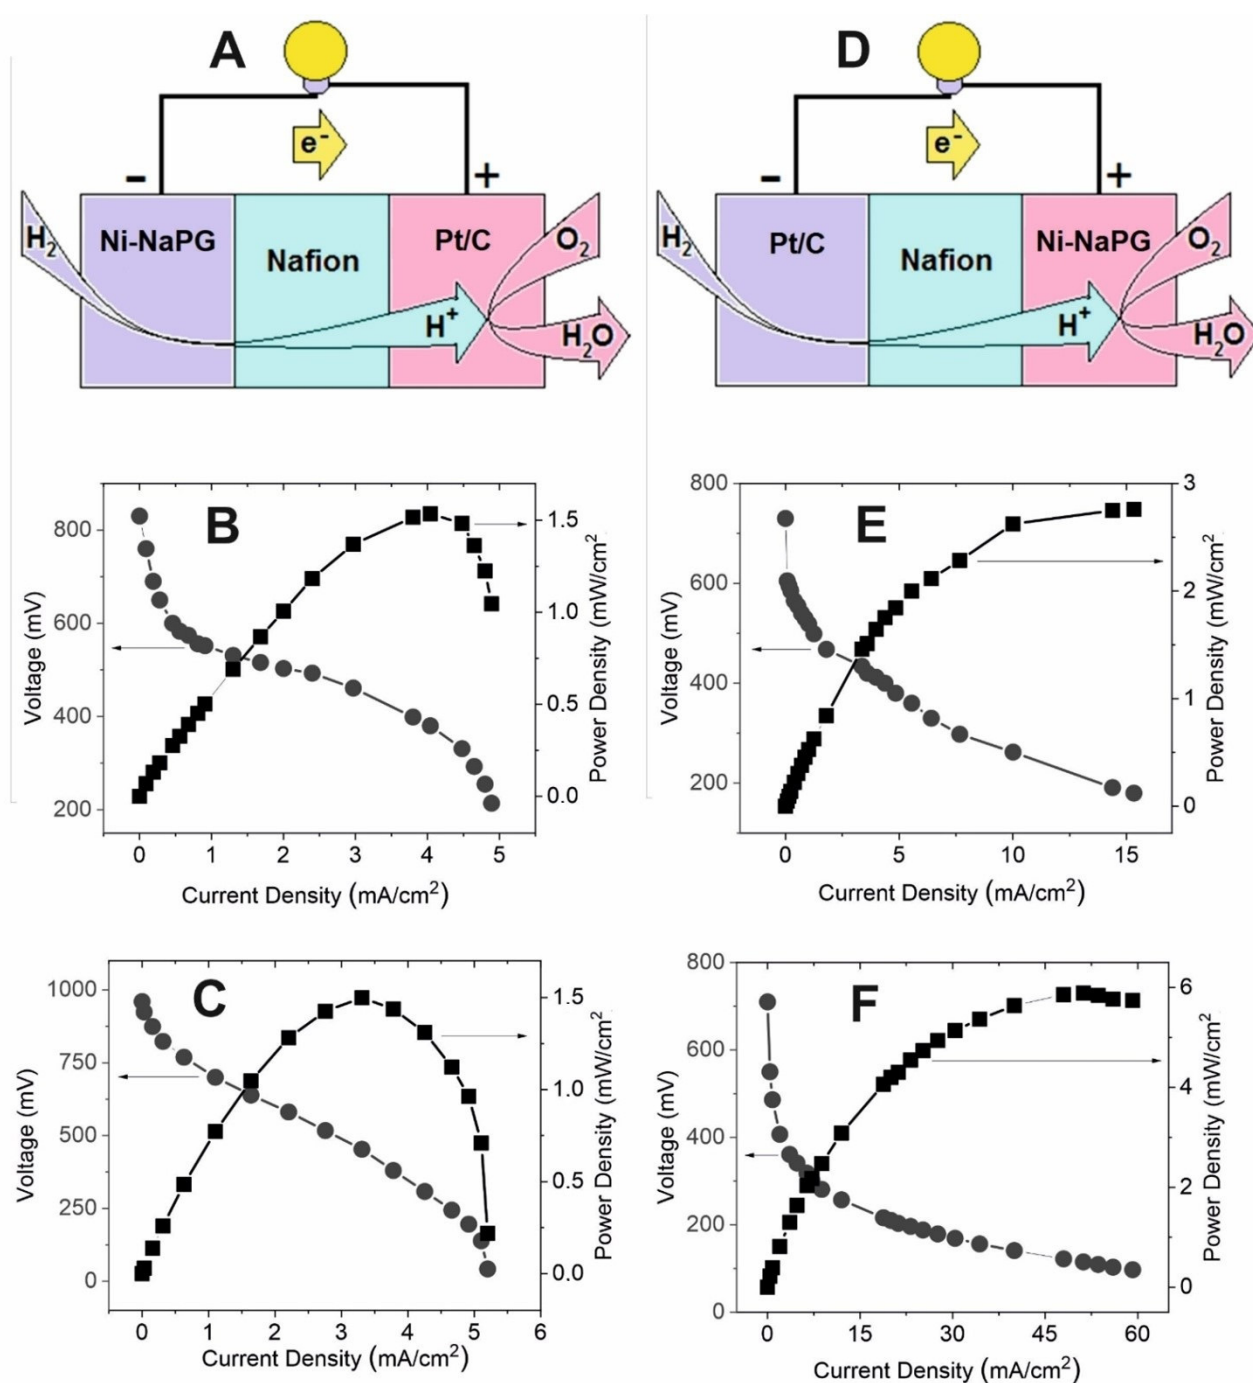

**Figure S3.** Representations (A, D) of the  $H_2/O_2$  PEMFC and polarization and power curves at  $80^\circ C$  for MEAs Ni(15%)-NaPG/Nf/Pt (B), Ni(25%)-NaPG/Nf/Pt<sup>[a]</sup> (C), Pt/Nf/Ni(15%)-NaPG (E), Pt/Nf/Ni(25%)-NaPG<sup>[b]</sup> (F).

<sup>[a]</sup> From M.K. Kadirov, S.T. Minzanova, I.R. Nizameev, M.N. Khrizanforov, L.G. Mironova, K.V. Kholin, D.M. Kadirov, E.S. Nefed'ev, M.V. Morozov, A.T. Gubaidullin, Yu.H. Budnikova, O.G. Sinyashin, *ChemistrySelect*, 2019, 4, 4731-4734.

<sup>[b]</sup> From Kadirov, M. K., Karasik, A. A., Nizameev, I. R., Strel'nik, I. D., Kholin, K. V., Kadirov, D. M., Ismaev, T.I., Budnikova, Y.H., Sinyashin, *Energy Technology*, 2018, 6(6), 1088-1095.

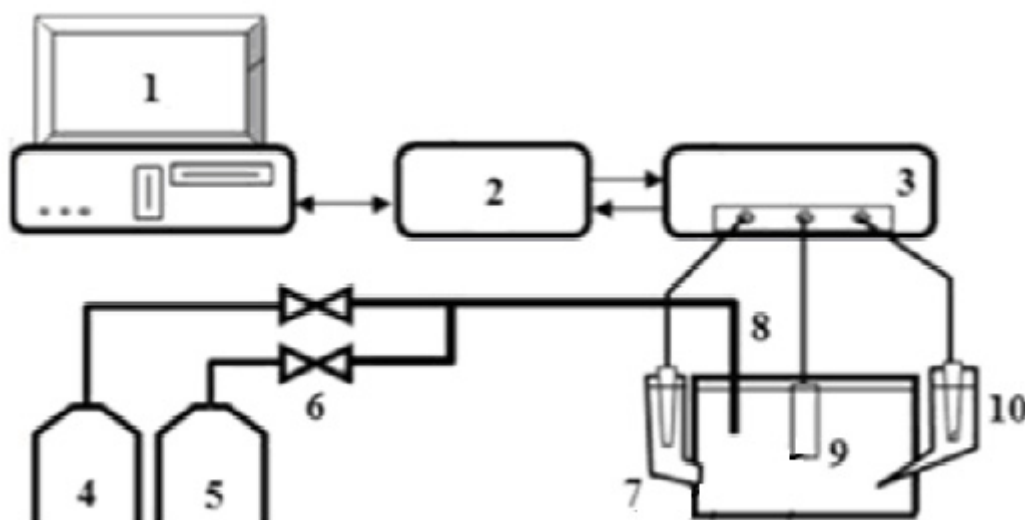

**Figure S4.** The scheme of electrochemical set-up. 1- computer, 2 – potentiostat Elins P-20x, 3 – rotating disc electrode – Basi RDE-2, 4 – vessel with inert gas (Ar), 5 – vessel with oxygen, 6 – valve of microadjusting, 7 – counter electrode, 8 – capillary for gas introducing, 9 – working electrode, 10 – reference electrode.

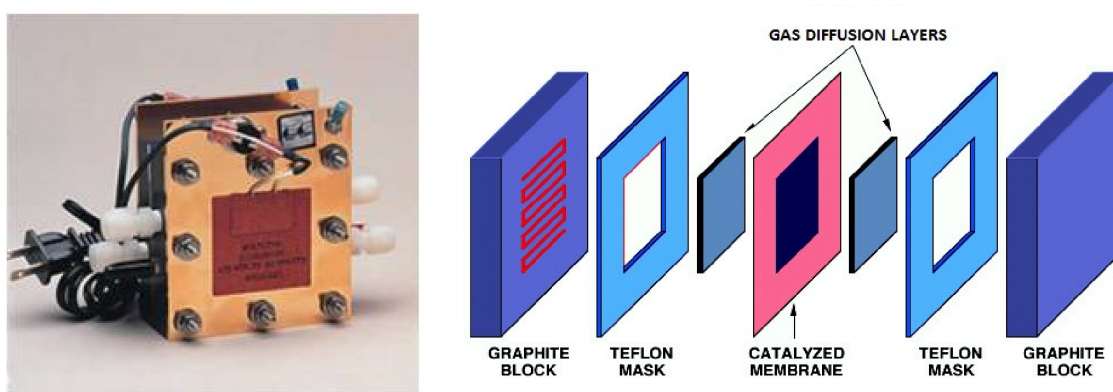

**Figure S5.** Scheme and appearance of the standard PEMFC used in the tests.
